# Supplementary material
Source: PubMed Central journal article supplement (PMC4261028)

# Episodic mood disorders

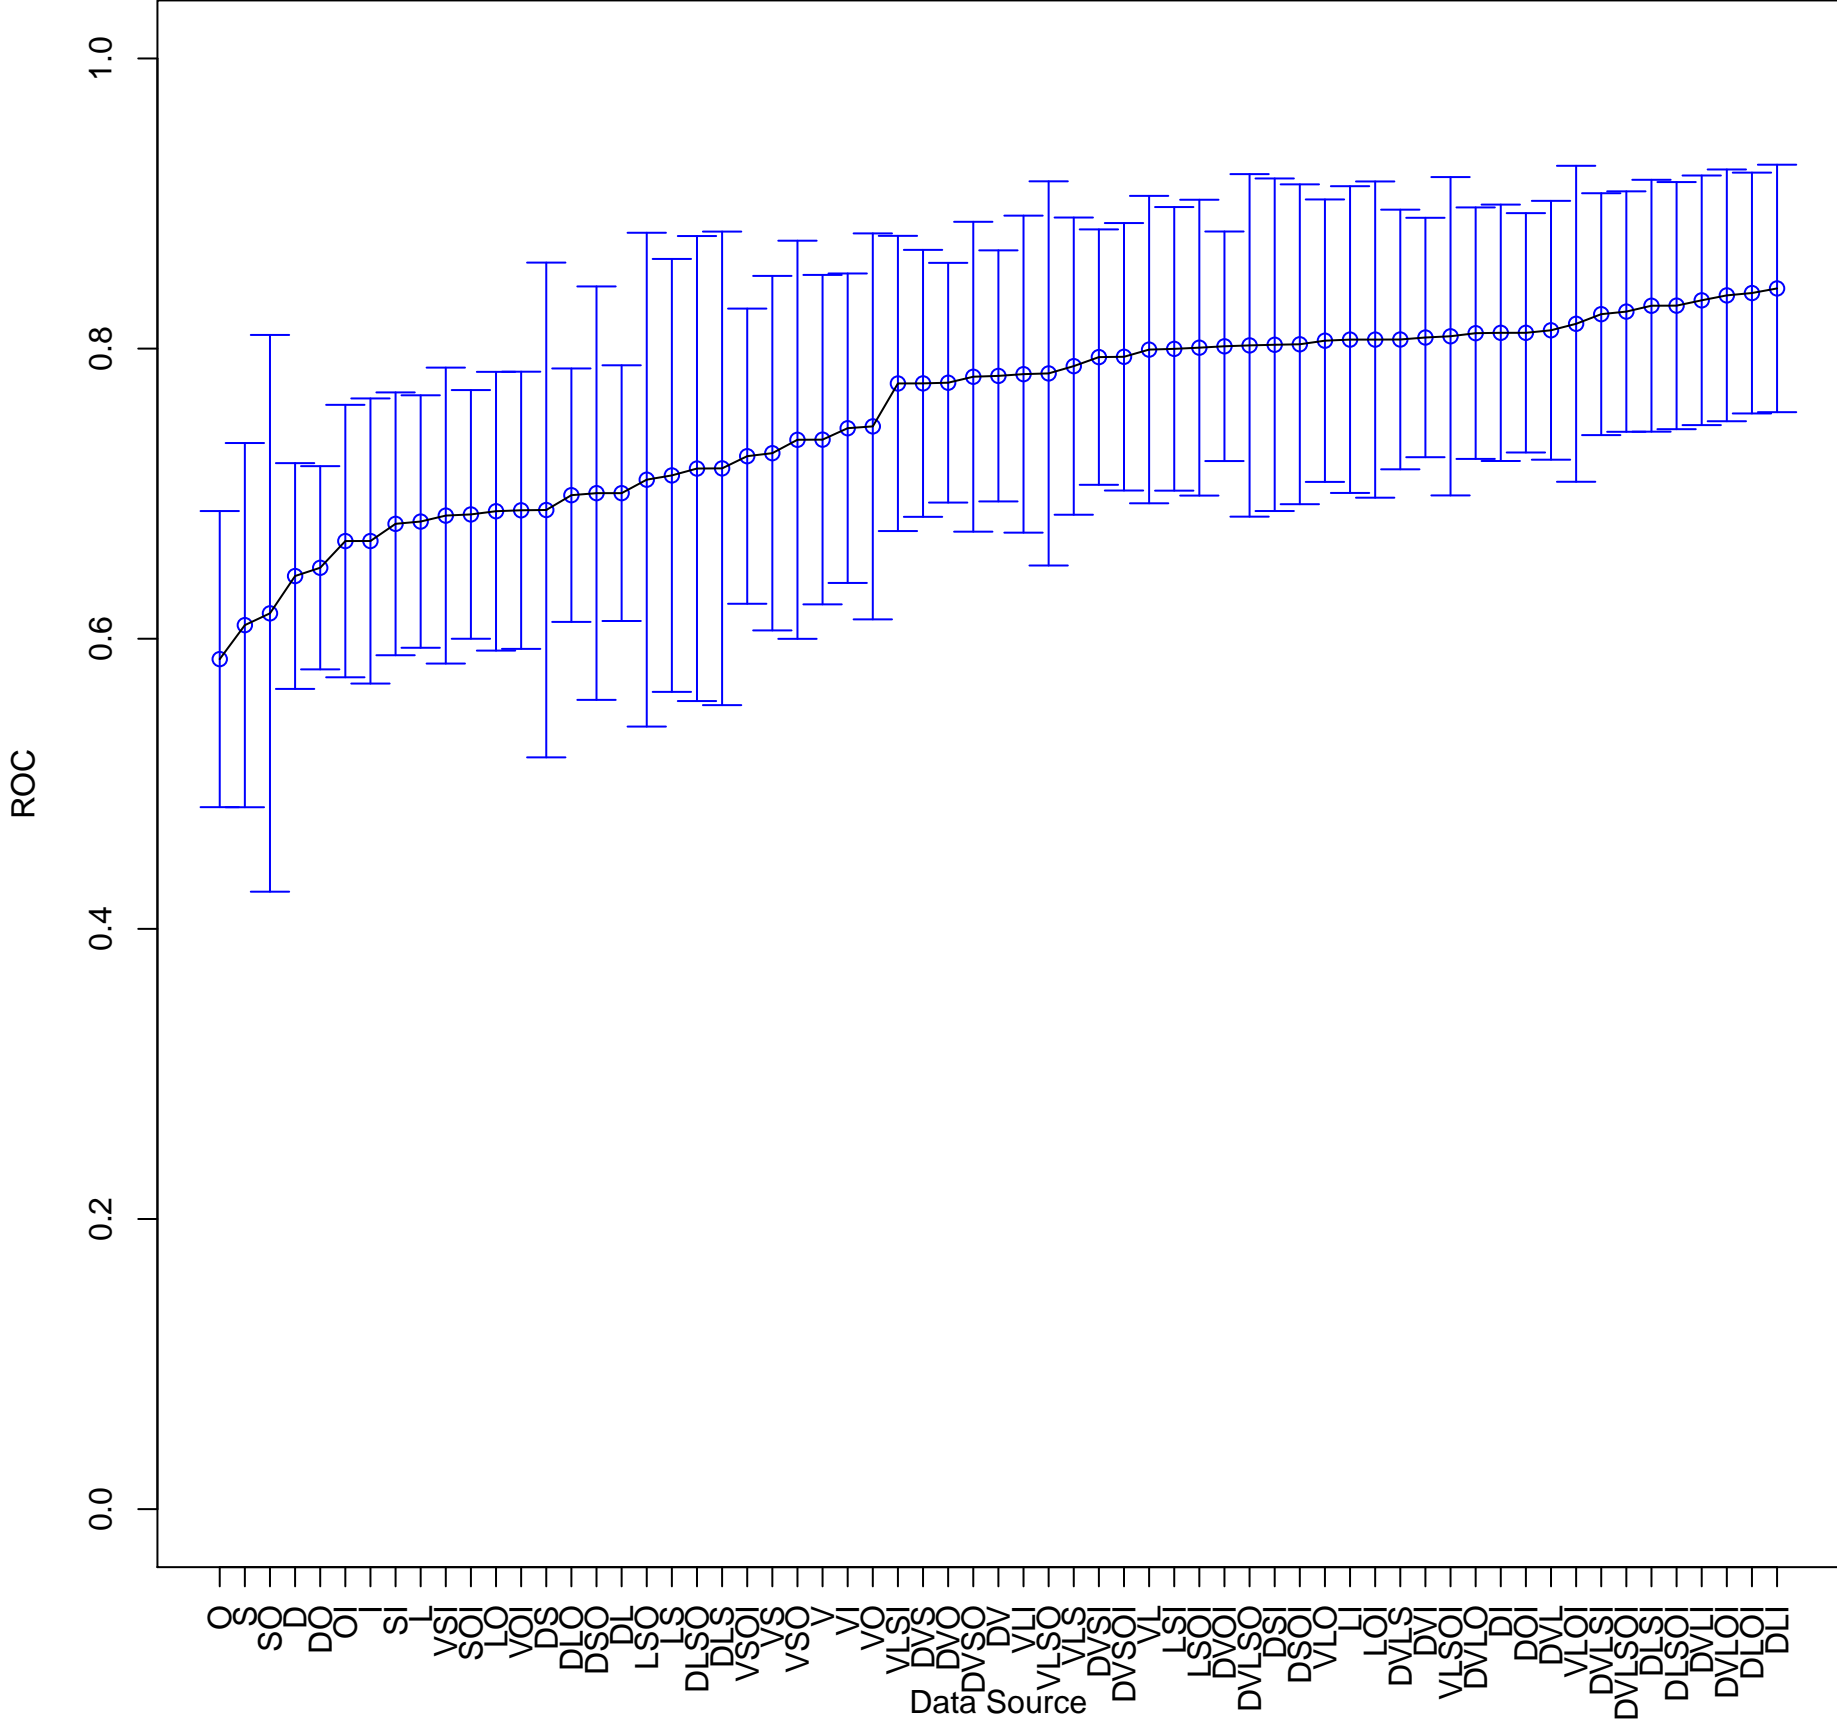

Supplement: NIHMS627742-supplement-9.pdf [file NIHMS627742-supplement-9.pdf]
